# The NEW [www.appi.org](http://www.appi.org) makes its debut! Visit today

## The new [www.appi.org](http://www.appi.org) offers:

- Special Discounts for American Psychiatric Association Members and Members-in-Training
- Detailed descriptions on more than 700 titles plus subscription products
- **My Account** history with order and tracking information
- Fast and easy navigation
- Enhanced search engine

The screenshot shows the homepage of the American Psychiatric Publishing website. At the top, there is a navigation bar with links for 'About APPI', 'Newsletter', 'Contact Us', 'Customer Service', and 'Permissions, Licensing & Reprints'. Below this is a secondary navigation bar with categories: 'Disorders', 'Subjects', 'Assessment & Treatment', 'Guides, References & Manuals', 'Books', 'Journals', and 'eContent'. A search bar is prominently displayed with a 'Go' button and a link to 'Advanced Search'. On the left, there is a 'Featured Titles' section highlighting 'Long-Term Psychodynamic Psychotherapy' by Glen O. Gabbard, M.D., with a 'Paperback • \$65.00' price tag and an 'Add to Cart' button. Below this is a section for 'Explore the DSM Library' featuring the 'DIAGNOSTIC AND STATISTICAL MANUAL OF MENTAL DISORDERS, FOURTH EDITION, TEXT REVISION, DSM-IV-TR'. On the right side, there is a 'Resources' section with links for 'APA Members', 'Educators', 'Authors', 'Librarians', 'Subscription Agents', 'Resellers', and 'International Customers'. Below that is a 'Search Books' section powered by Google. At the bottom of the page, there is a footer with copyright information: '© 2010 American Psychiatric Publishing, Inc. | 1000 Wilson Boulevard, Suite 1825, Arlington, VA 22209 | 800-368-5777 or 703-967-7322 | Fax: 703-967-1091 | [appi@psych.org](mailto:appi@psych.org) | Privacy Policy'.

**Special Discount for Members:**  
**15% Discount** for APA Members  
**30% Discount** for APA Members-in-Training

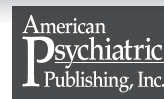

The First and Last Word in Psychiatry

American Psychiatric Publishing, Inc.  
[appi@psych.org](mailto:appi@psych.org) • 1-800-368-5777 • 703-907-7322

Priority Code AH1024

Find us on [facebook](https://www.facebook.com) and [twitter](https://twitter.com)

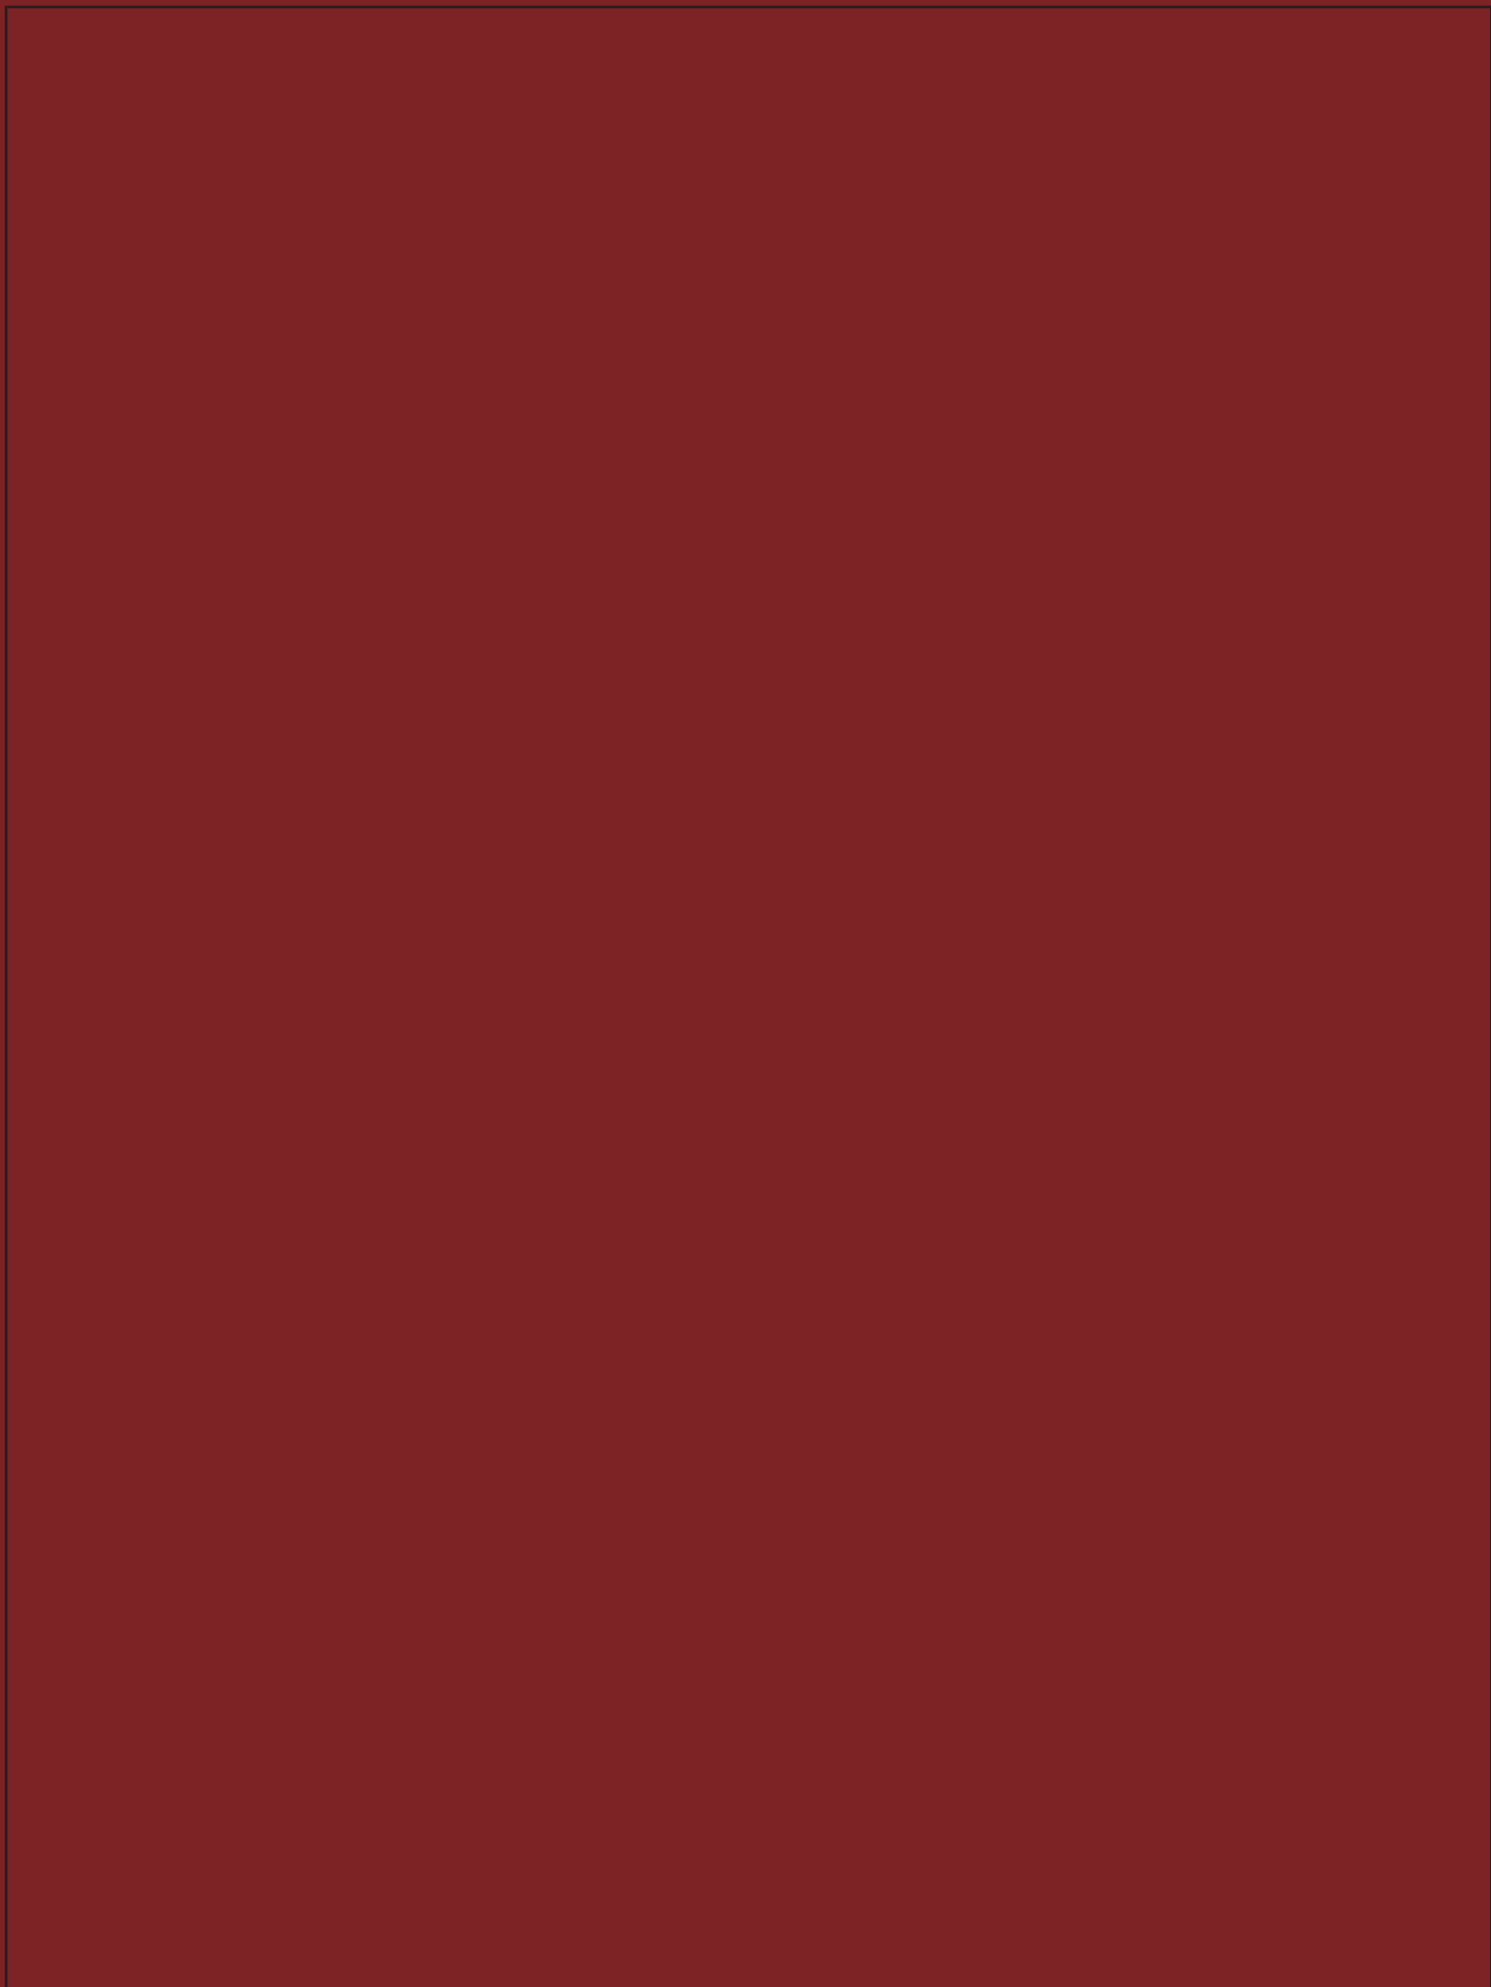

Source: https://psychiatryonline.org/doi/suppl/10.1176/foc.2010.8.issue-3/suppl_file/back.pdf
