# FOCUS

THE JOURNAL OF LIFELONG LEARNING IN PSYCHIATRY



## *Genetics and Genomics*

*Guest Editors, Michele T. Pato, M.D.  
Carlos N. Pato, M.D., Ph.D.*

### IN CLINICAL SYNTHESIS:

#### Genetic Strategies in Psychiatric Disorders

*Michele T. Pato, M.D.  
Janet L. Sobell, Ph.D.  
Michael Pato, B.A.  
Dimitri Bacos, M.D.  
Carlos N. Pato, M.D., Ph.D.*

#### Genetics of Depression

*John M. Hettema, M.D., Ph.D.*

#### Genetic Studies of Schizophrenia and Bipolar Disorder

*Ayman H. Fanous, M.D.*

#### Advances and Challenges in the Genetics of Autism

*Daniel B. Campbell, Ph.D.*

#### The Genetics of Obsessive-Compulsive Disorder

*S. Evelyn Stewart, M.D.  
David L. Pauls, Ph.D.*

### AND INFLUENTIAL PUBLICATIONS . . .
