# FOCUS



THE JOURNAL OF LIFELONG LEARNING IN PSYCHIATRY

## *Genetics and Genomics*

*Guest Editors, Michele T. Pato, M.D.  
Carlos N. Pato, M.D., Ph.D.*

### IN CLINICAL SYNTHESIS:

#### Genetic Strategies in Psychiatric Disorders

*Michele T. Pato, M.D.*

*Janet L. Sobell, Ph.D.*

*Michael Pato, B.A.*

*Dimitri Bacos, M.D.*

*Carlos N. Pato, M.D., Ph.D.*

#### Genetics of Depression

*John M. Hettema, M.D., Ph.D.*

#### Genetic Studies of Schizophrenia and Bipolar Disorder

*Ayman H. Fanous, M.D.*

#### Advances and Challenges in the Genetics of Autism

*Daniel B. Campbell, Ph.D.*

#### The Genetics of Obsessive-Compulsive Disorder

*S. Evelyn Stewart, M.D.*

*David L. Pauls, Ph.D.*

### AND INFLUENTIAL PUBLICATIONS . . .

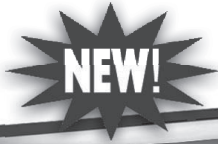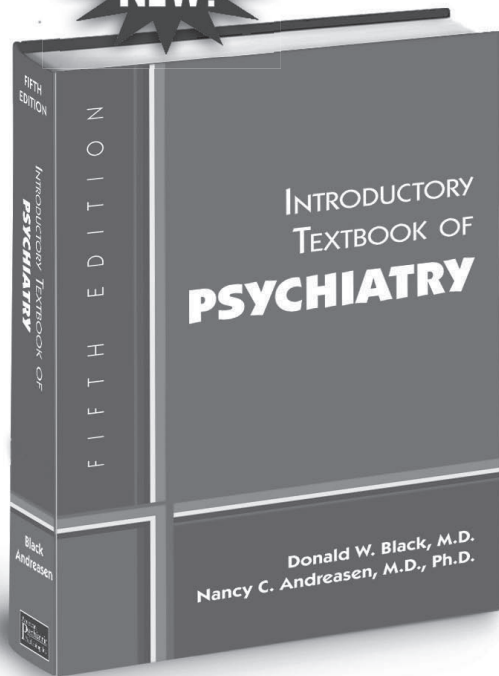

# Introductory Textbook of Psychiatry, Fifth Edition

Donald W. Black, M.D., and  
Nancy C. Andreasen, M.D., Ph.D.

Now in its fifth edition, this best-selling book has been revised and updated to reflect the latest advancements in the field. Guiding readers in an easy-to-follow, conversational style, the expert authors and teachers divide the text into three parts:

- Part I focuses on the background of psychiatry, including diagnosis and classification, interview and assessment techniques, and the neurobiology and genetics behind mental illness. It includes a detailed introduction to psychiatric interviewing.
- Part II introduces the clinical student to all DSM disorders arranged by diagnostic category—everything from dementia and alcohol abuse, to schizophrenia and sexual dysfunction, to eating disorders and impulse-control disorders. Each chapter contains an overview of the disorder, epidemiology and etiology, diagnostic criteria, and up-to-date treatment information, before going on to a more in-depth examination of several specific disorders within that given category.
- Part III addresses special topics, such as legal issues, child psychiatry, psychotherapy, and psychopharmacology.

The *Introductory Textbook of Psychiatry*, Fifth Edition, is a comprehensive textbook made for learning. This relevant and essential tool will give its readers an advantageous start in the exciting field of contemporary psychiatry.

Donald W. Black, M.D., is Professor of Psychiatry and Director of Residency Training at The University of Iowa Roy J. and Lucille A. Carver College of Medicine in Iowa City, Iowa.

Nancy C. Andreasen, M.D., Ph.D., is the Andrew H. Woods Chair of Psychiatry and Director, Neuroimaging Research Center, and Mental Health Clinical Research Center, The University of Iowa Roy J. and Lucille A. Carver College of Medicine in Iowa City, Iowa.

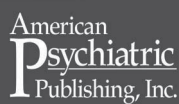

The First and Last  
Word in Psychiatry

2011 • 736 pages • ISBN 978-1-58562-382-2 • Hardcover • \$99.00 • Item #62382

2011 • 736 pages • ISBN 978-1-58562-400-3 • Paperback • \$69.00 • Item #62400

Order Online: [www.appi.org](http://www.appi.org) • Toll Free: 1-800-368-5777

Fax: 703-907-1091 • Email: [appi@psych.org](mailto:appi@psych.org) Find us on Facebook and Twitter. Priority Code AH1038
